# Supplementary material
Source: Springer Nature journal article supplement (https://www.springermedizin.de/resource/supplementary/12943_2004_80_MOESM4_ESM.pdf/9553390)

**3A**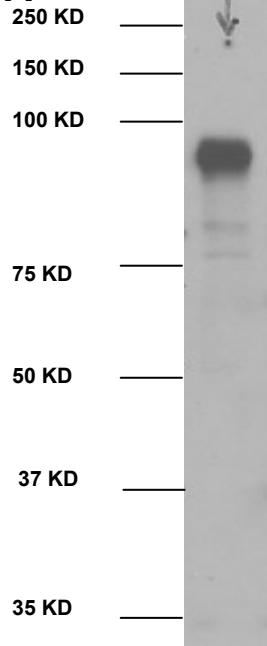**3C**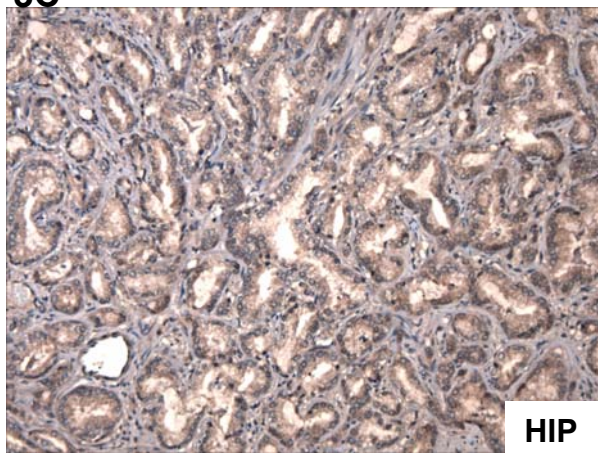**3B**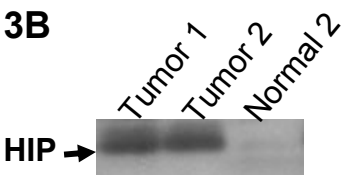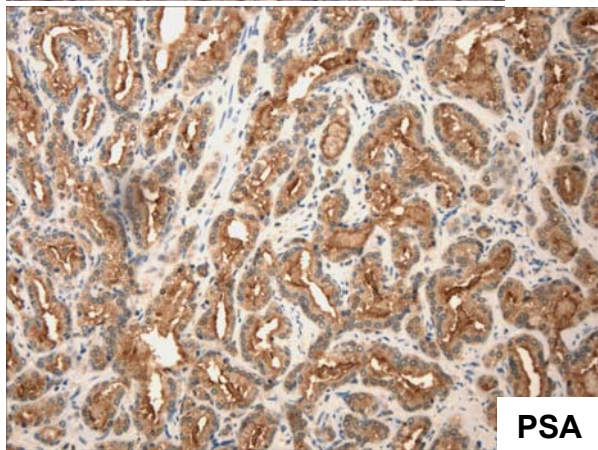

Supplement: MOESM4 [file 9553390]
